# Supplementary material
Source: PubMed Central journal article supplement (PMC7175465)

Figure 2A

LNCaP

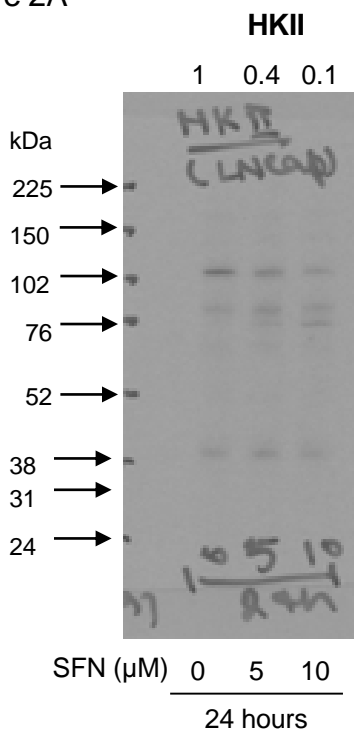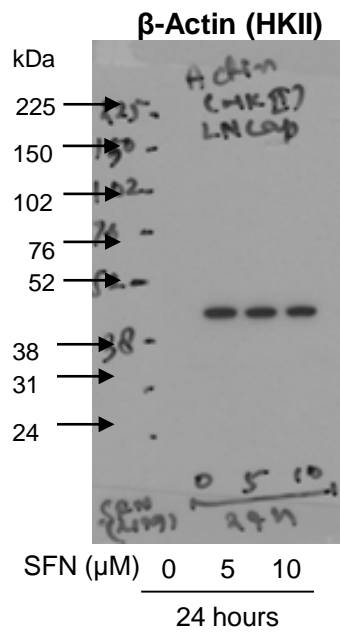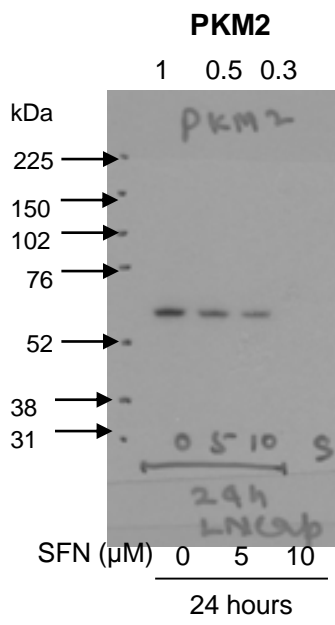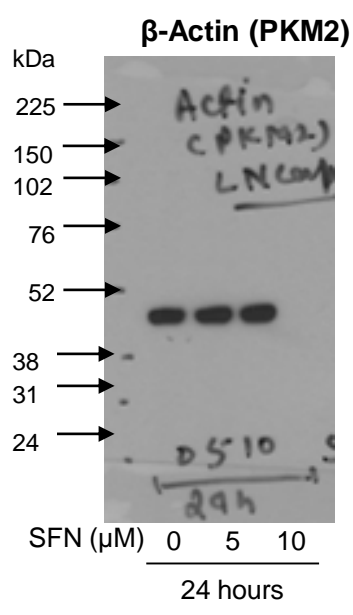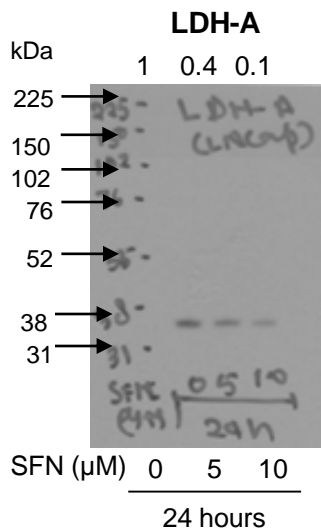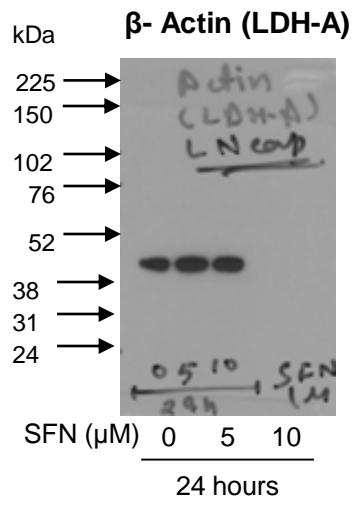

Figure 2A

22Rv1

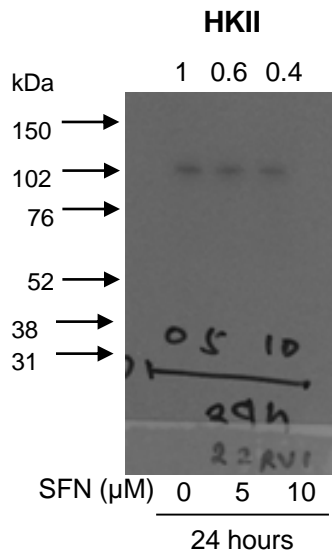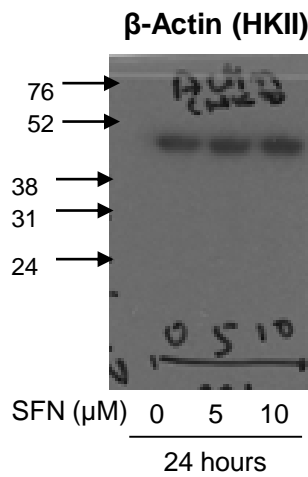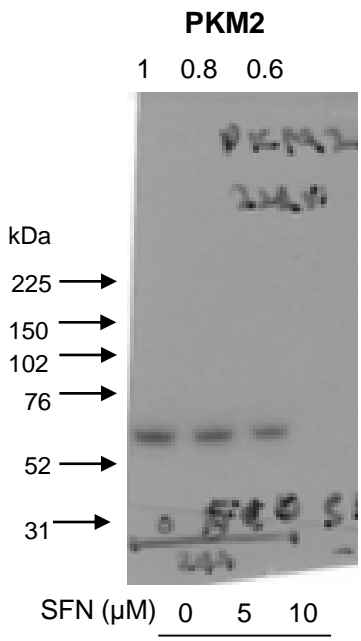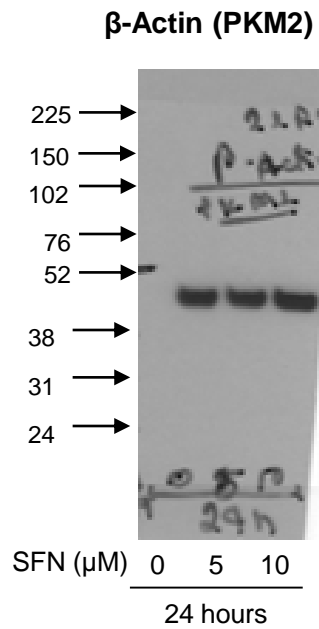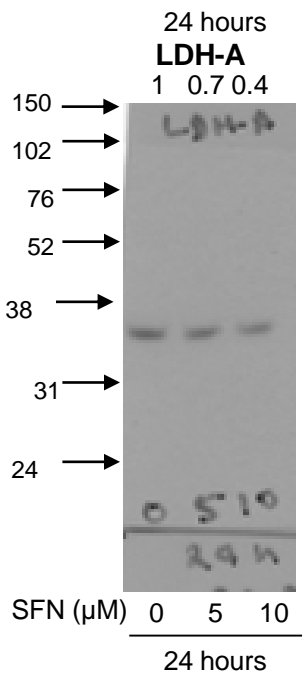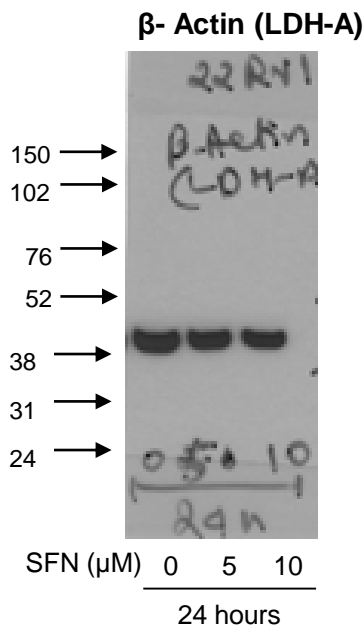

Figure 5A

**22Rv1 EV and Myc**

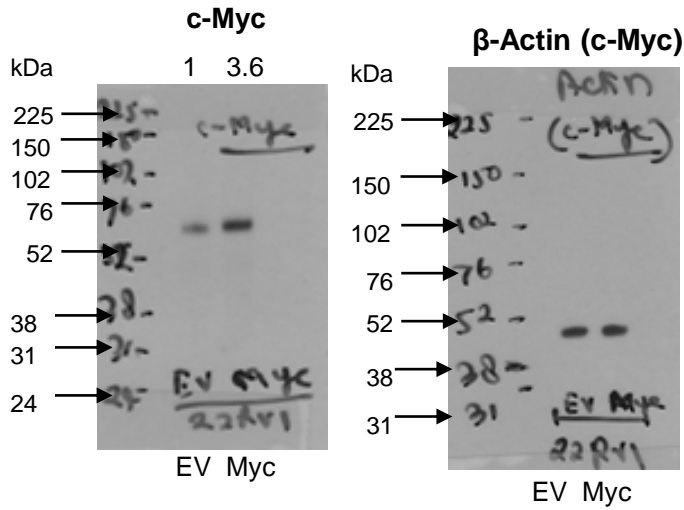

**22Rv1 EV and caAkt**

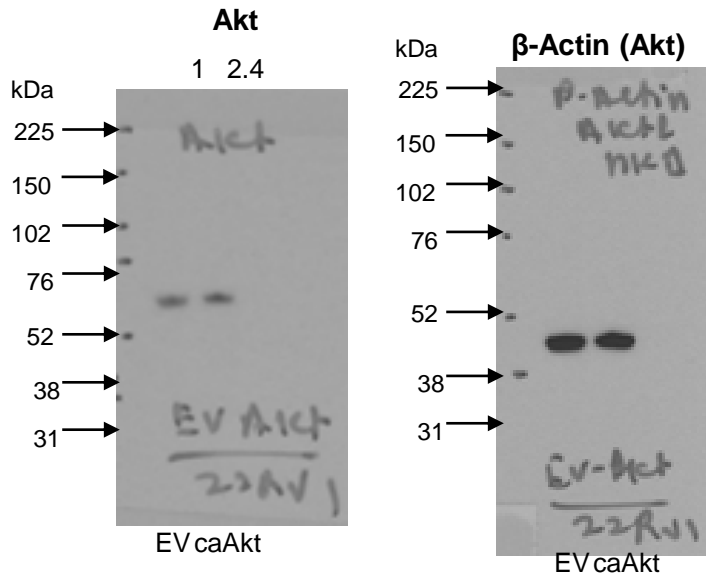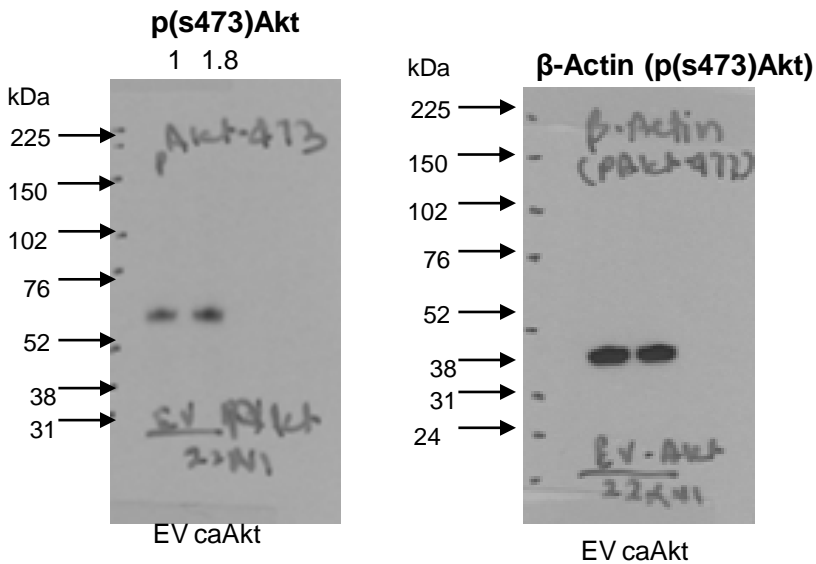

Figure 5B

22Rv1 EV and Myc

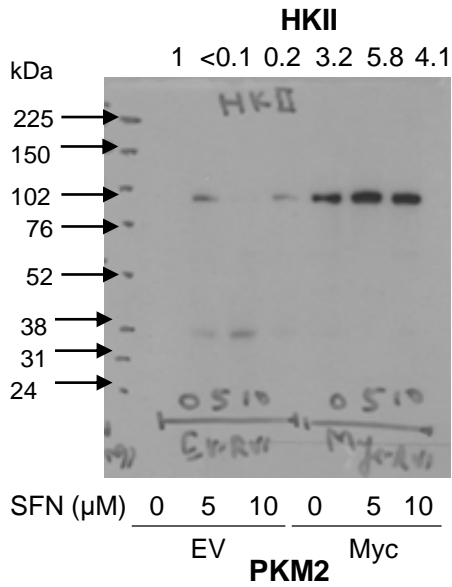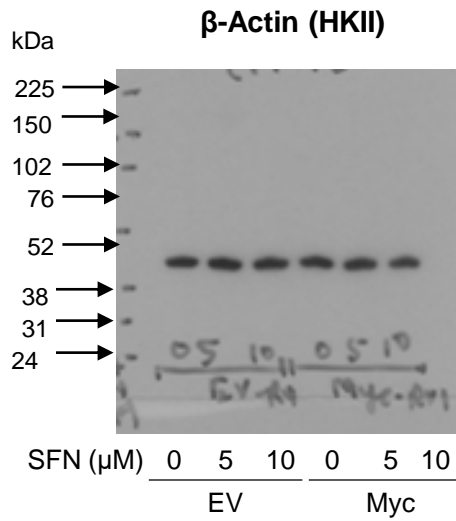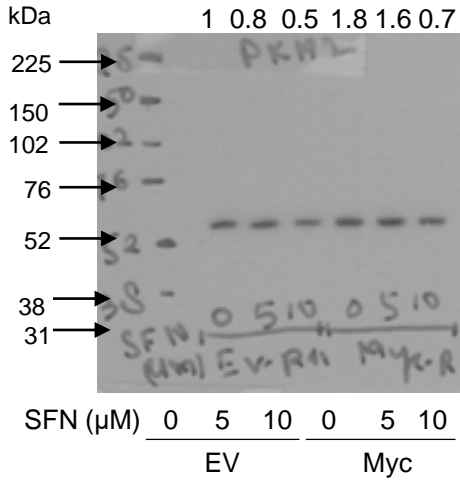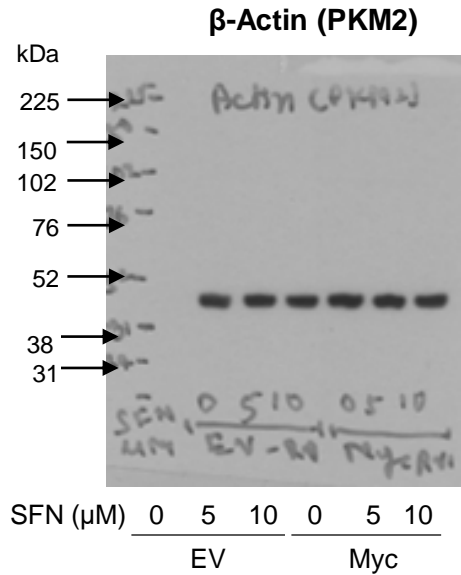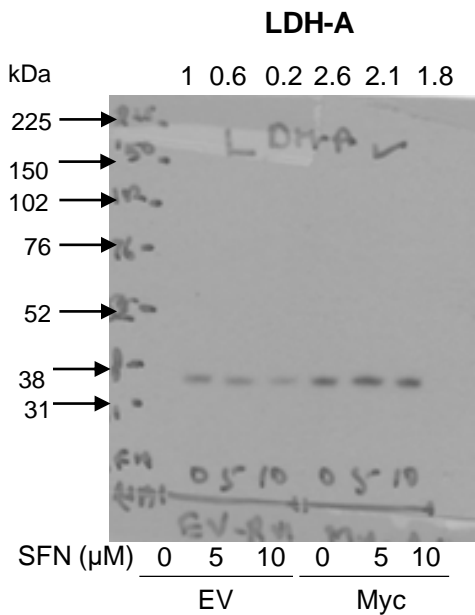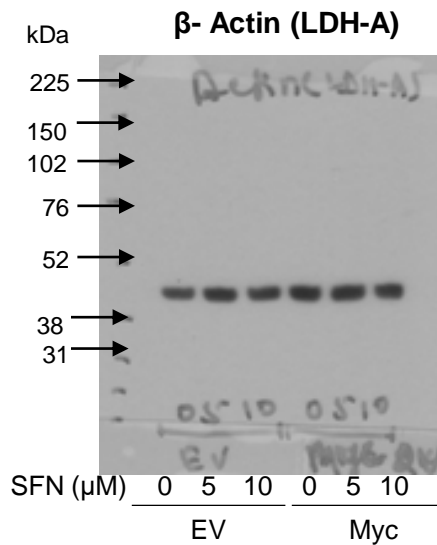

Figure 5B

22Rv1 EV and caAkt

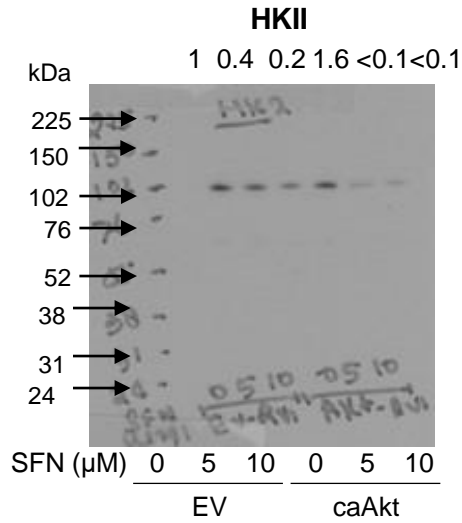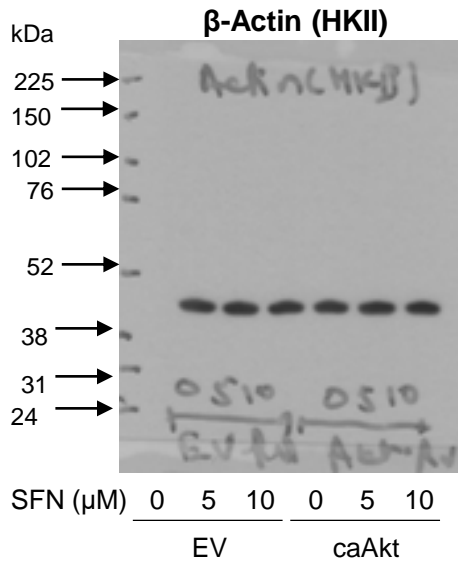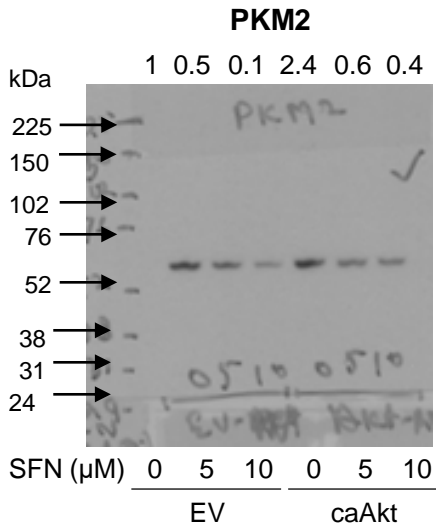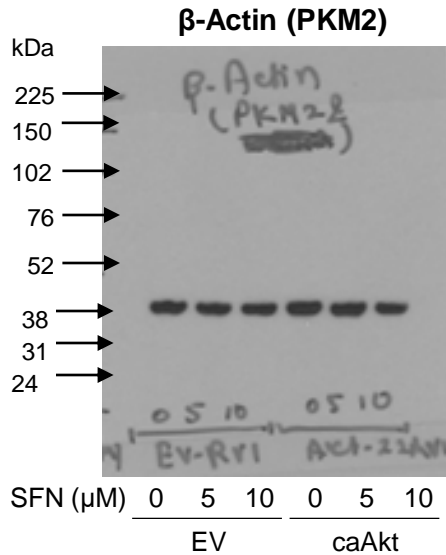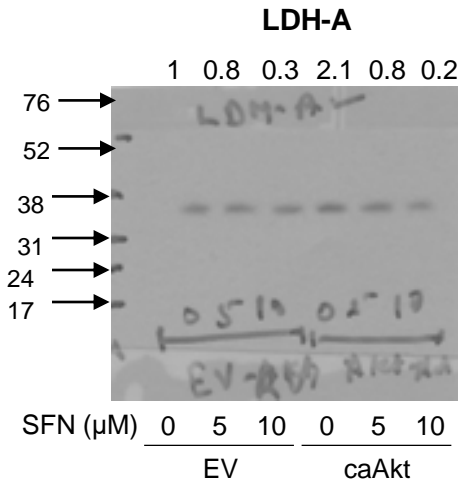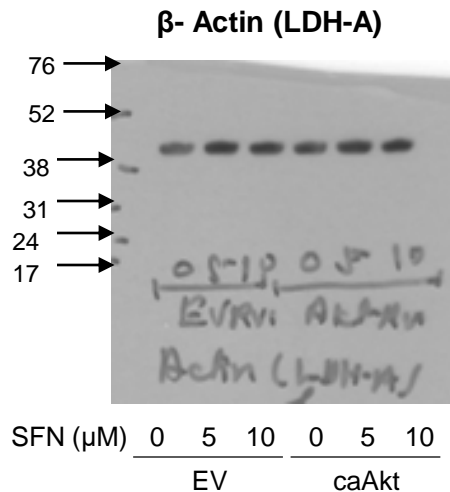

Supplementary Figure S3A

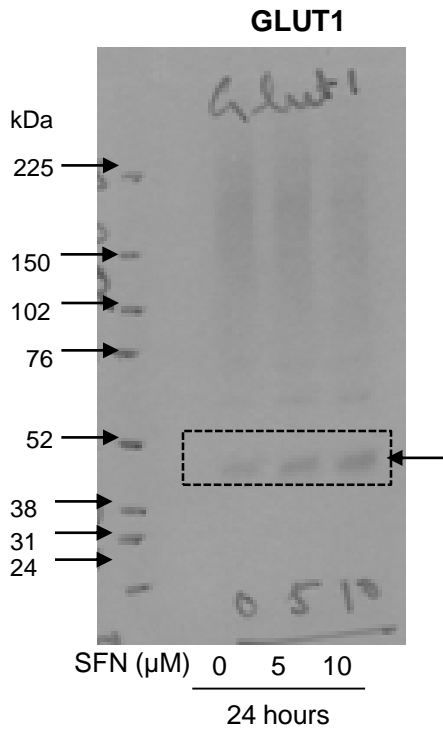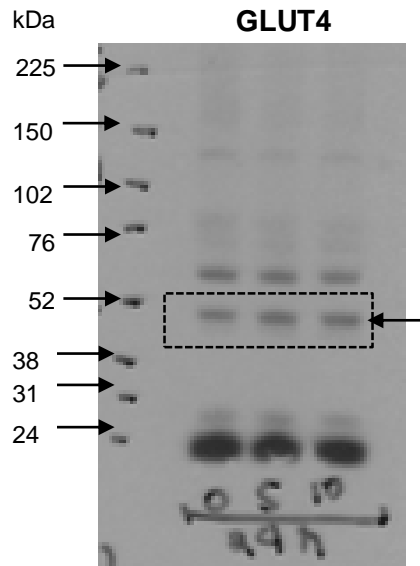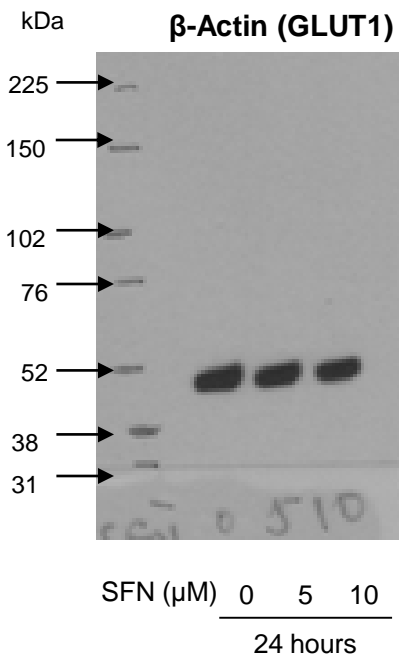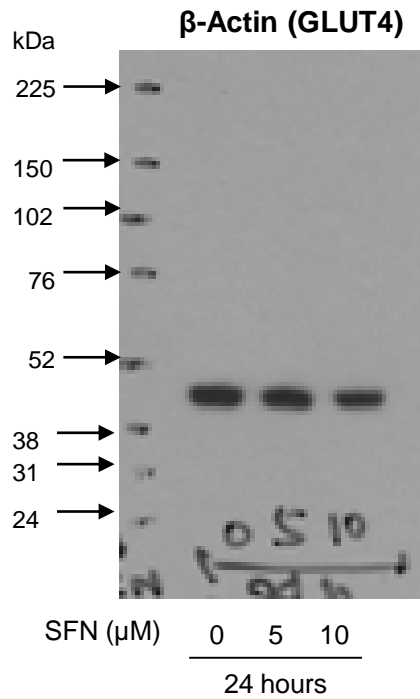

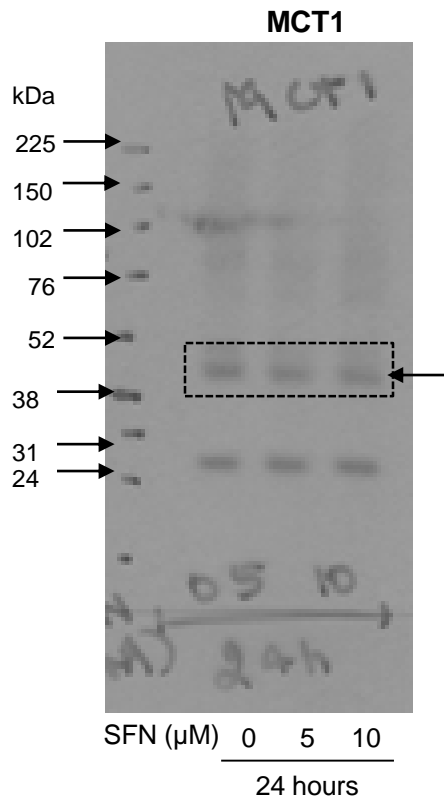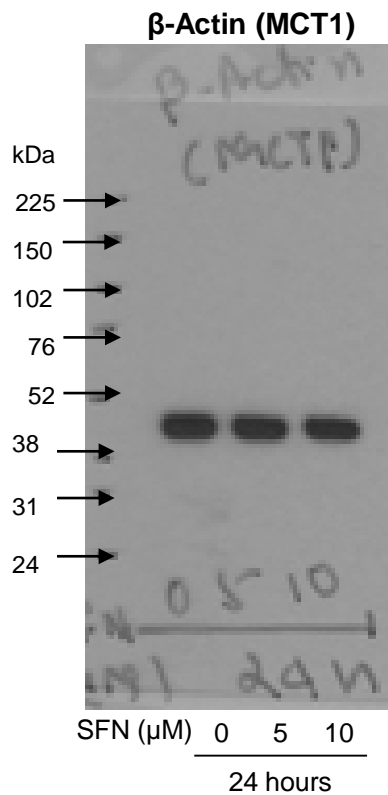

**GLUT1**

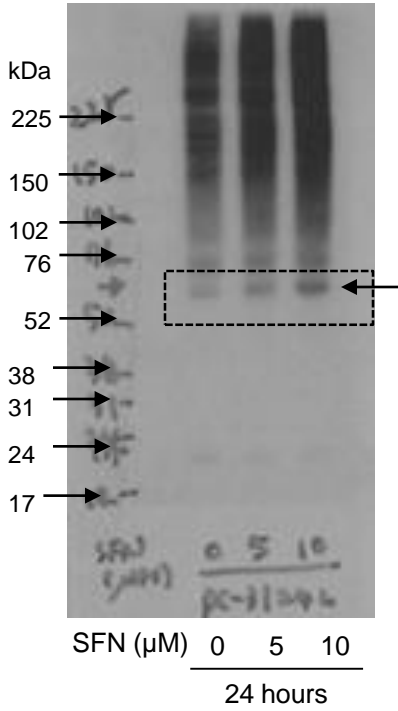

**GLUT4**

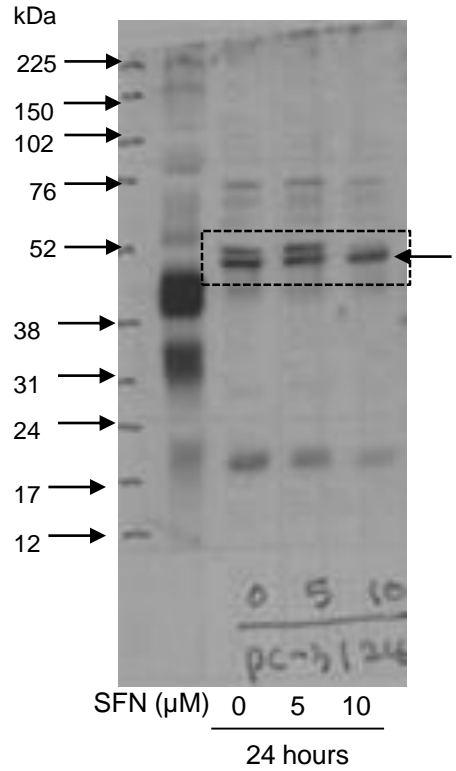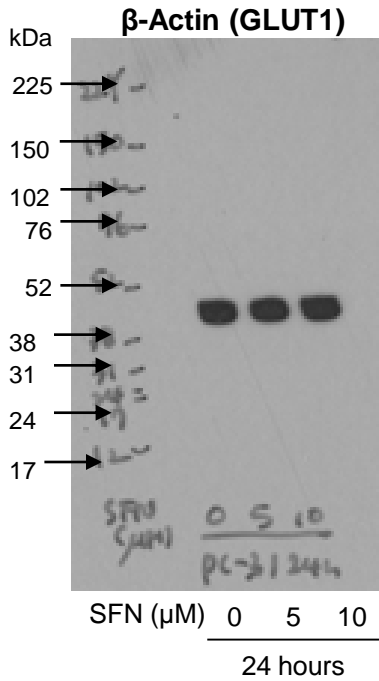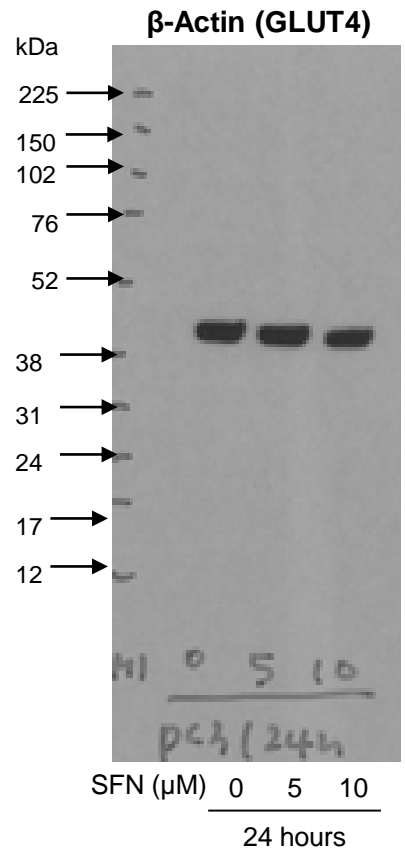



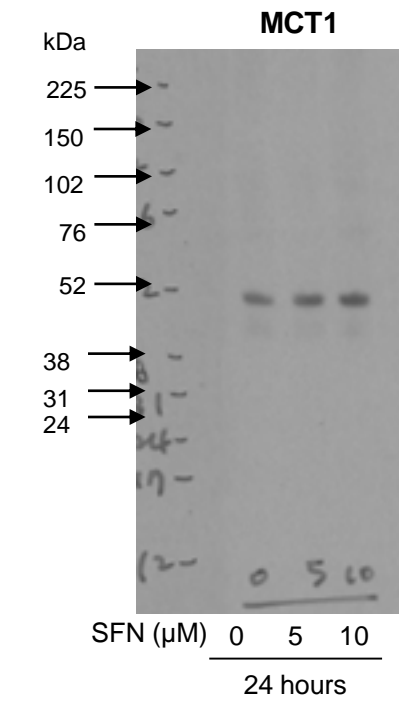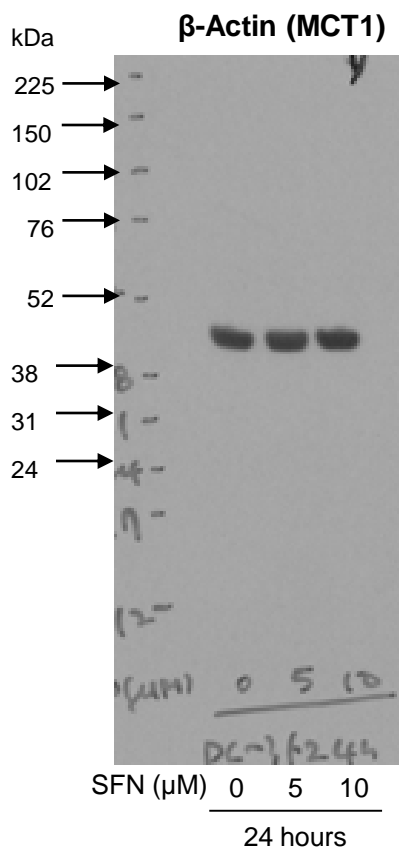

Supplement: bgz155_suppl_supplementary_figures.pdf [file bgz155_suppl_supplementary_figures.pdf]
