# Supplementary material
Source: PubMed Central journal article supplement (PMC7175465)

**Supplementary Figure S1:** Effect of SFN treatment on ECAR in PC-3 cells. **(A)** Pharmacological profiling of ECAR in PC-3 cells through real-time measurements using the Seahorse flux analyzer following 9 h treatment with DMSO or SFN (5 or 10  $\mu$ M). Quantitation of **(B)** basal ECAR and **(C)** oligomycin-induced ECAR in PC-3 cells following 9 h treatment with DMSO or SFN. This experiment was repeated three times in triplicate and combined data are shown as mean  $\pm$  SEM.

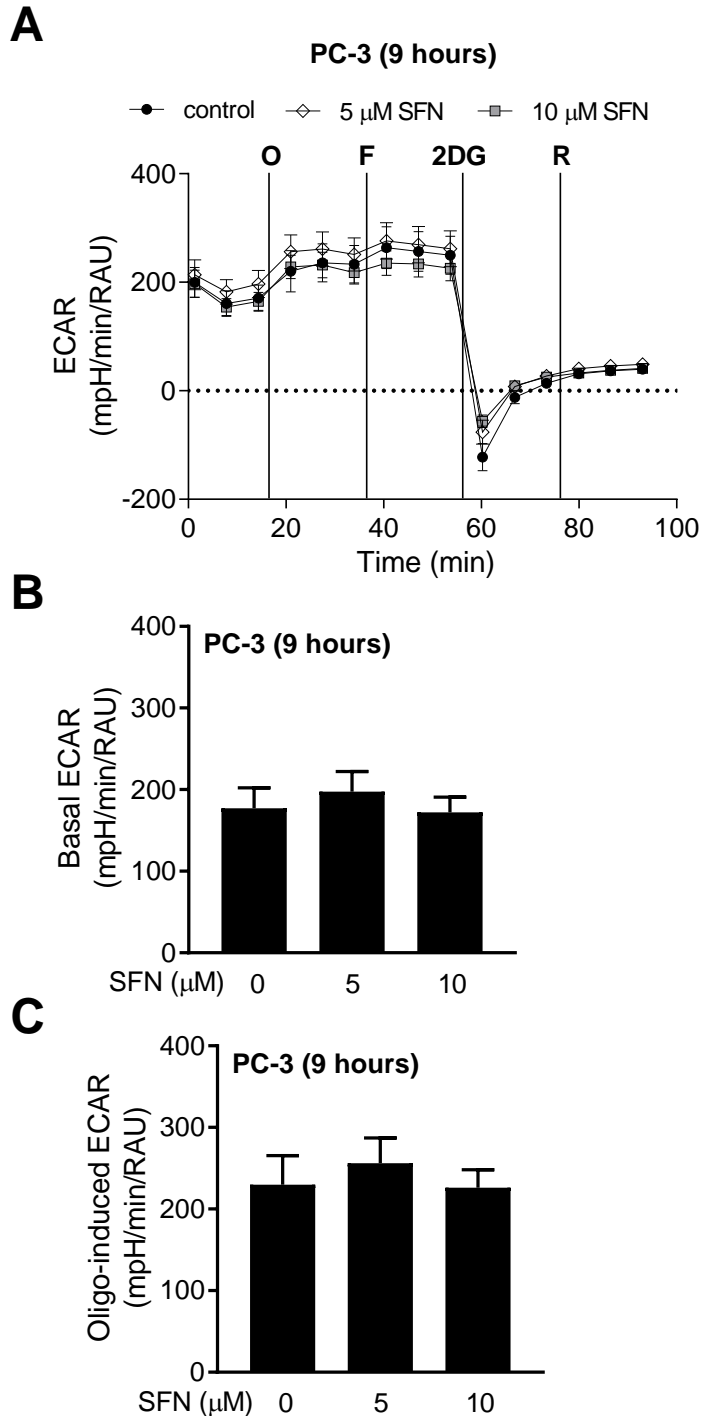

Supplement: bgz155_suppl_supplementary_figure_s1.pdf [file bgz155_suppl_supplementary_figure_s1.pdf]
