# Supplementary material
Source: PubMed Central journal article supplement (PMC7175465)

**Supplementary Figure S2:** Effect of SFN treatment on glucose uptake in LNCaP or PC-3 cells (24-hour treatment). Experiment was repeated two times in triplicate and combined data are shown as mean  $\pm$  SD. \*Significantly different compared to control by one-way ANOVA followed by Dunnett's test.

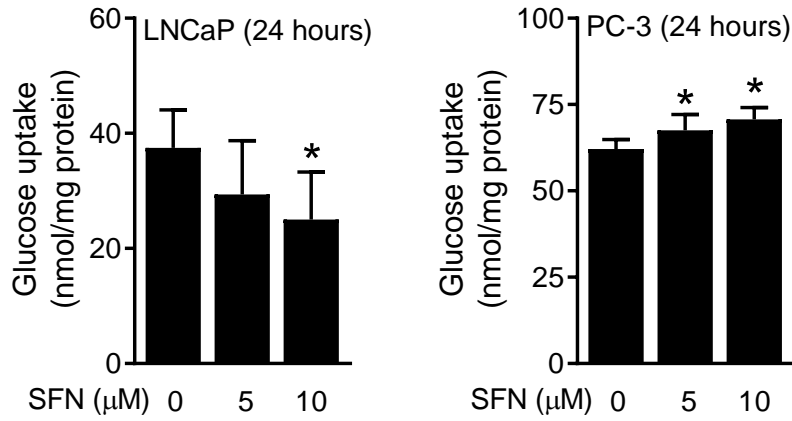

Supplement: bgz155_suppl_supplementary_figure_s2.pdf [file bgz155_suppl_supplementary_figure_s2.pdf]
