# Supplementary material
Source: PubMed Central journal article supplement (PMC7175465)

**Supplementary Figure S3:** SFN treatment did not decrease expression of GLUT1, GLUT4 or MCT1 in LNCaP or PC-3 cells. **(A)** Western blots for GLUT1, GLUT4, and MCT1 using lysates from control and SFN-treated LNCaP or PC-3 cells. The immunoblotting for GLUT1, GLUT4, and MCT1 proteins was performed three times using independently prepared lysates from control and SFN-treated LNCaP and PC-3 cells (Supplementary Figure S3A). Probing with the anti-GLUT1 and anti-GLUT4 antibodies exhibited non-specific band(s) in each experiment for the PC-3 cells (double bands). However, densitometric quantitation was done for the correct molecular weight size band for each protein. **(B)** Quantitation of western blots. Results shown are mean  $\pm$  SD (n=3).

**A**

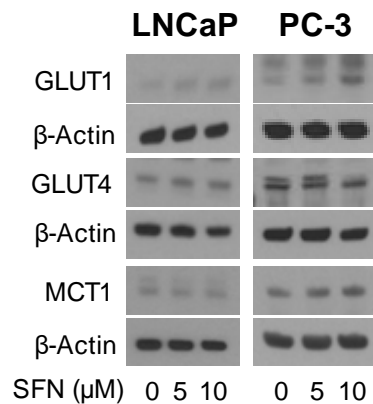

**B**

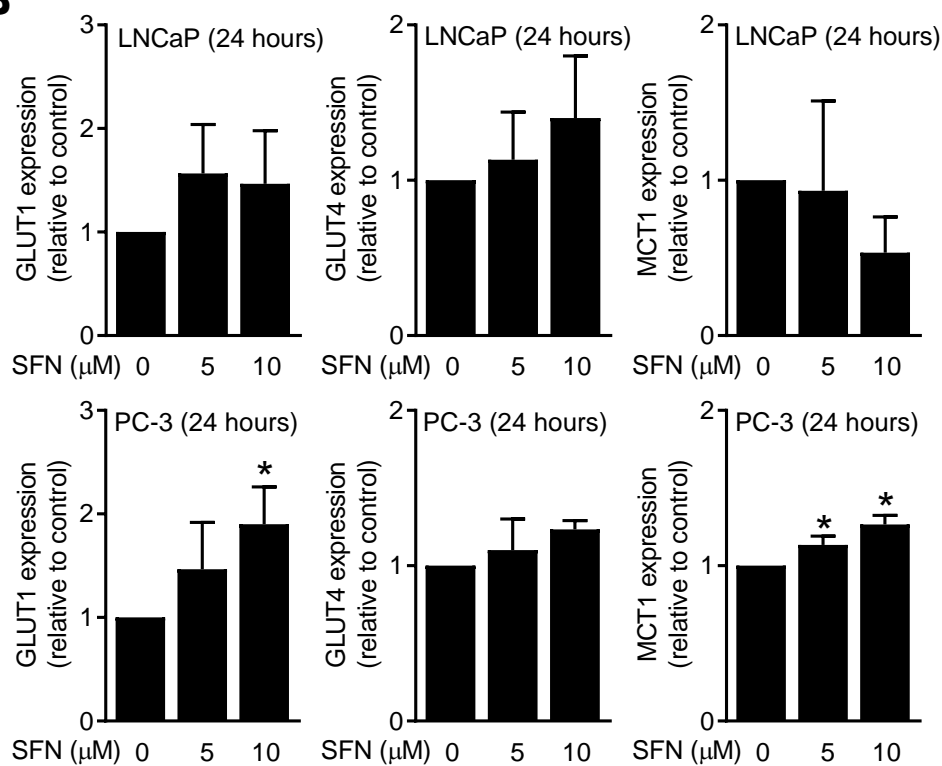

Supplement: bgz155_suppl_supplementary_figure_s3.pdf [file bgz155_suppl_supplementary_figure_s3.pdf]
